# Supplementary material
Source: PubMed Central journal article supplement (PMC5719247)
Supplement: develop-144-156752-s1.pdf [file develop-144-156752-s1.pdf]

## Supplemental Figures

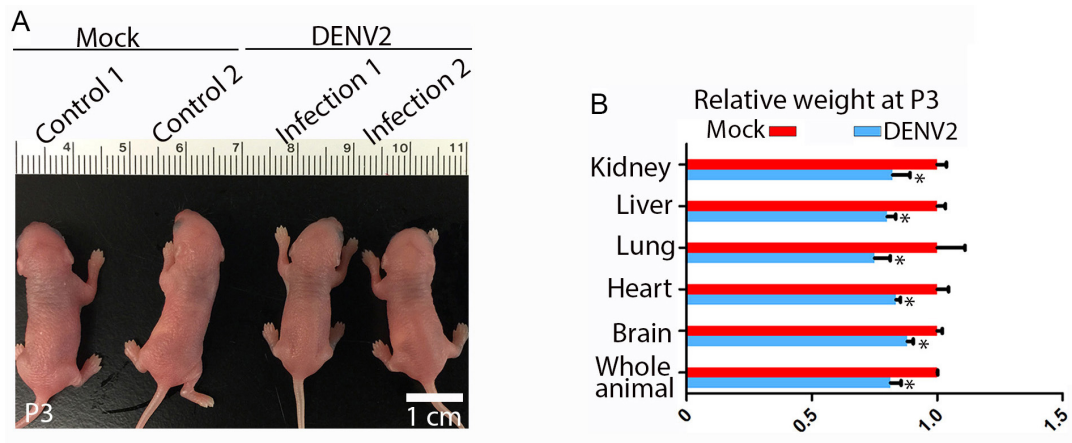

Fig.S1

**Fig. S1: DENV2 is sufficient to cause growth restriction at P3.** (A) Dorsal views of P3 mouse pups after mock or DENV2 intracerebral inoculation of the brain at E14.5. Scale bar: 1 cm. (B) Relative weights of different organs from control and DENV2 infected pups at P3. Error bars indicate the SEM of four independent experiments, \* $p < 0.05$  (Student's t-test).

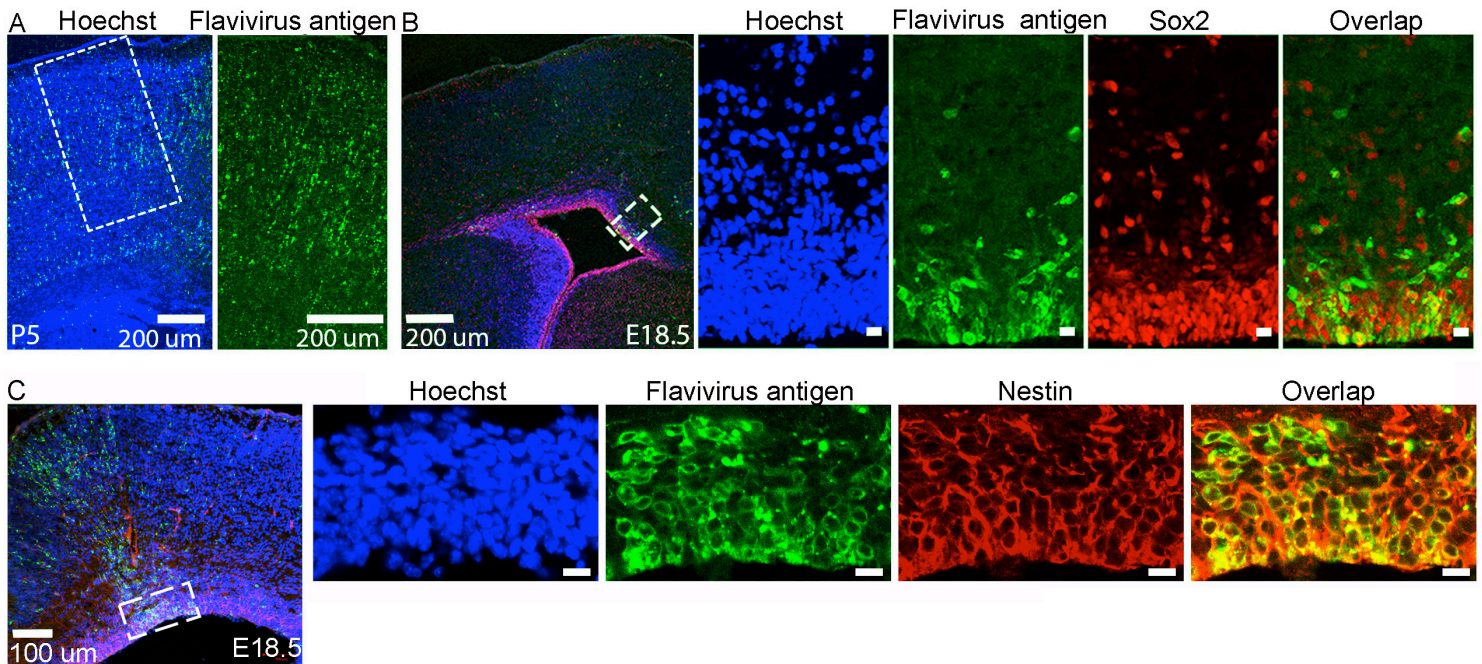

**Fig. S2: DENV2 infection has minimal impact on NPC proliferation.** (A) Confocal imaging of E18.5 cerebral cortex stained with antibodies against CldU (green) after 2hr CldU pulse. Hoechst stains nuclei (blue). Scale bar: 100 μm. (B) Quantification of the percentage of CldU-positive cells out of total cells in DENV2-infected cortices normalized to controls. Error bars indicate SEM of 9 sections from three independent experiments. Student's t-test revealed no significant difference between mock and DENV2-infected groups. (C) Confocal imaging of E18.5 cerebral cortex stained with antibodies against Cyclin D1 (red). Hoechst stains nuclei (blue). Scale bar: 100 μm. (D) Quantification of the percentage of Cyclin D1-positive cells out of total cells in DENV2-infected cortices normalized to controls. Error bars indicate SEM of 9 sections from three independent experiments. Student's t-test revealed no significant difference between mock and DENV2-infected groups.

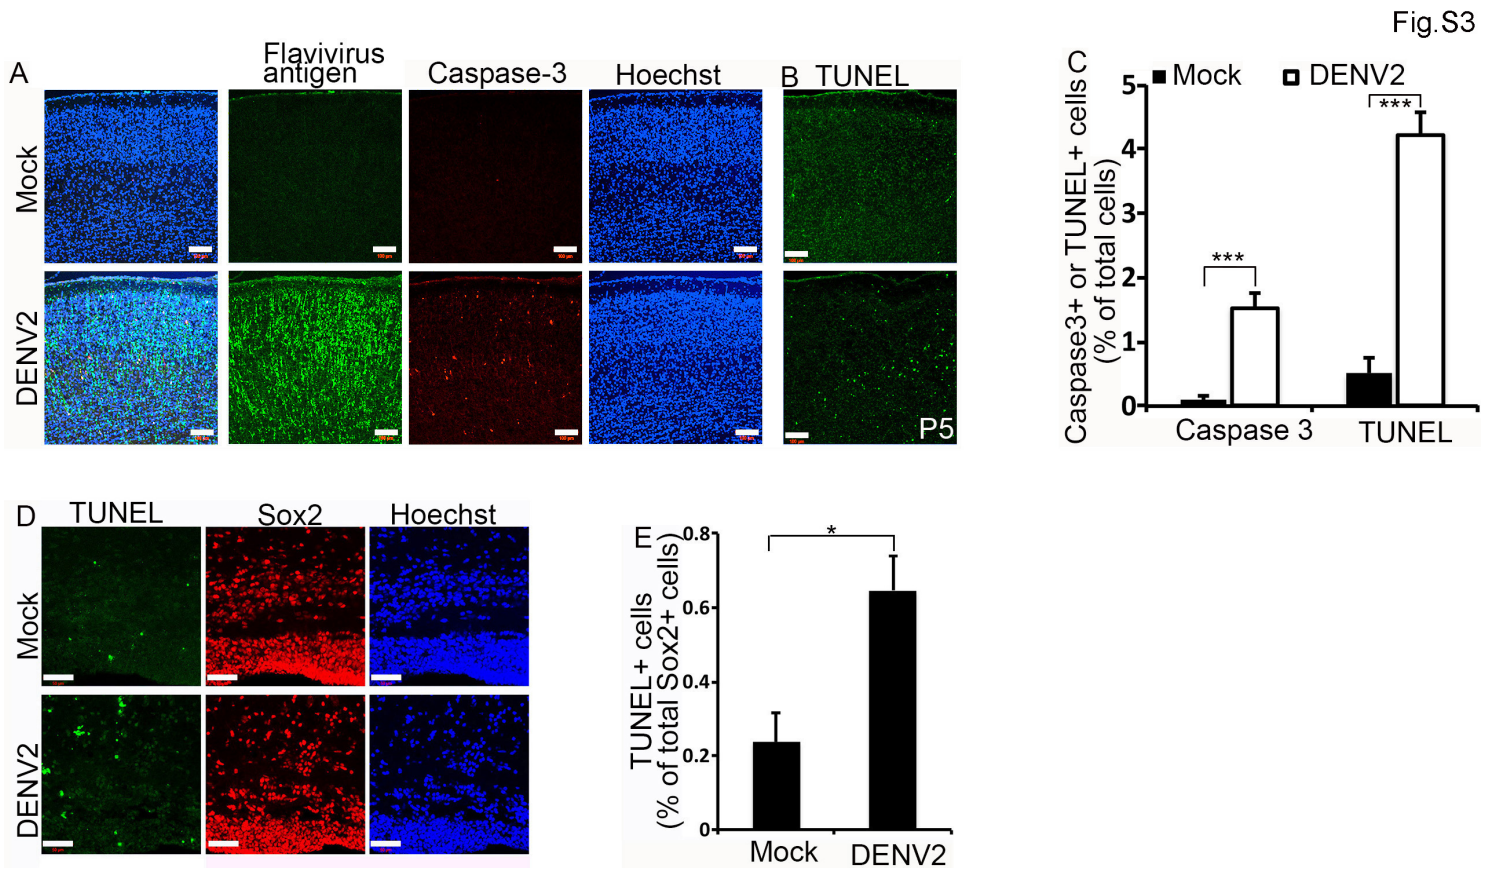

**Fig. S3: DENV2 infection leads to increased cell death in neurons and NPCs.** (A) Confocal imaging of P5 cerebral cortex stained with antibodies against Flavivirus group antigen (labeling DENV2, green) and cleaved Caspase 3 (red). Hoechst stains nuclei (blue). Scale bar: 100  $\mu$ m. (B) TUNEL staining (green) reveals an increase in cell death in DENV2-infected cortices compared to controls. Hoechst stains nuclei (blue). Scale bar: 100  $\mu$ m. (C) Quantification of the percentage of Caspase-3 or TUNEL-positive cells out of total cells in DENV2-infected cortices normalized to controls. Error bars indicate SEM of 9 sections from three independent experiments, \*\*\* $p$  < 0.001 (Student's t-test). (D) TUNEL staining (green) reveals apoptotic cell death in Sox2-positive neural progenitor cells (NPCs) (red). Hoechst stains nuclei (blue). Scale bar: 50  $\mu$ m. (E) Quantification of the percentage of TUNEL- and Sox2-double positive cells out of total Sox2-positive cells in D. Error bars indicate SEM of 9 sections from three independent experiments, \* $p$  < 0.05 (Student's t-test).

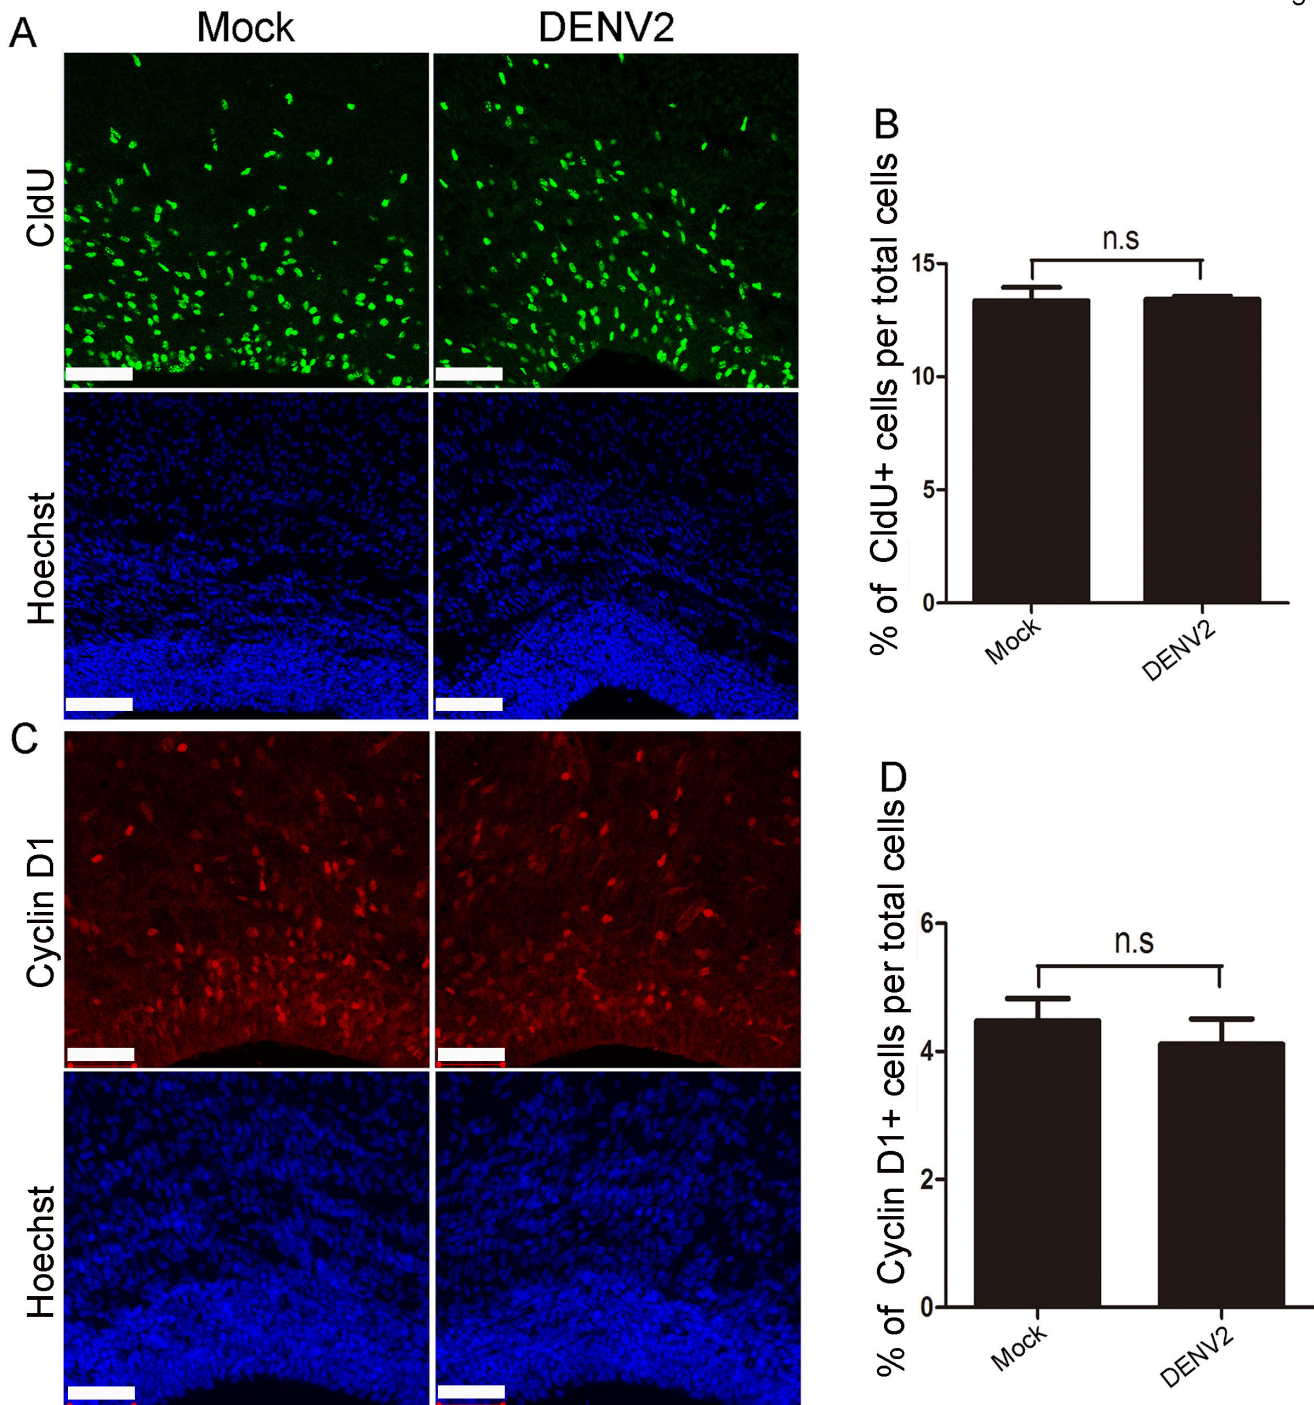

**Fig. S4: MEX1-44, but not DENV2, infection causes NPC cell cycle arrest.**

(A) Confocal imaging of E18.5 cerebral cortex stained with antibodies against Ki67 (labeling proliferating cells, far red) and Flavivirus group antigen (labeling DENV2 and MEX1-44, green). Hoechst stains nuclei (blue). Scale bar: 100  $\mu$ m. (B) Quantification of the percentage of Ki67-positive cells out of total cells. Error bars indicate SEM of 9 sections from three independent experiments. Two-way ANOVA revealed a significant difference between MEX1-44 and mock, and between MEX1-44 and DENV2, but no significant difference between mock and DENV2,  $*p < 0.05$ . (C) Confocal imaging of E18.5 cerebral cortex stained with antibodies against p-Histone3 (labeling mitotic cells, red). Hoechst stains nuclei (blue). Scale bar: 100  $\mu$ m. (D) Quantification of the percentage of p-Histone3-positive cells out of total cells in DENV2/MEX1-44 infected cortexes normalized to mock. Error bars indicate SEM of 9 sections from three independent experiments, Two-way ANOVA revealed a significant difference between MEX1-44 and mock, and between MEX1-44 and DENV2, but no significant difference between mock and DENV2,  $*p < 0.05$ .

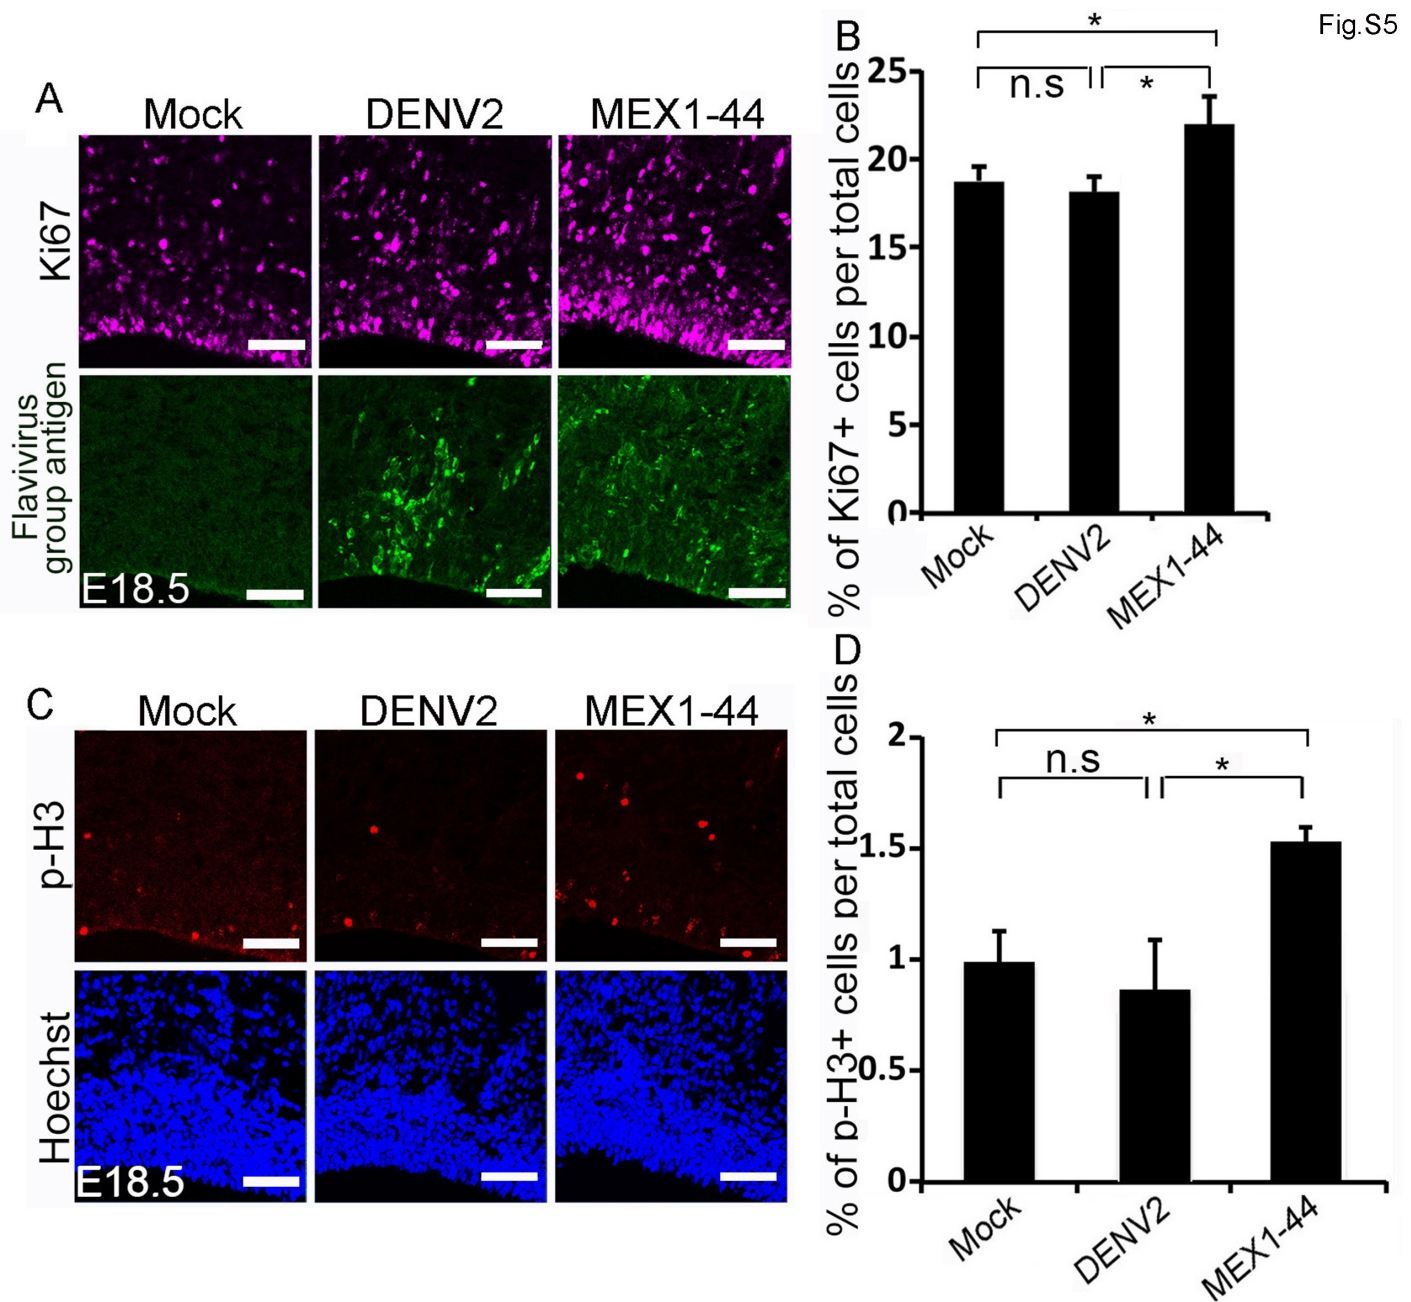

**Fig. S5: DENV2 infects NPCs and is detected in the cortical plate.** (A) Confocal imaging of E18.5 cortex after DENV2 inoculation of E14.5 brains stained with antibodies against Sox2 (red), and Flavivirus group antigen (green). Hoechst stains nuclei (blue). Scale bar: 200  $\mu$ m (left panel), 10  $\mu$ m (right panels). (B) Confocal imaging of P5 cortex after DENV2 inoculation of E14.5 brains stained with antibodies against Flavivirus group antigen (green). Hoechst stains nuclei (blue). Scale bar: 200  $\mu$ m. (C) Confocal imaging of E18.5 cortex after DENV2 inoculation of E14.5 brains stained with antibodies against Nestin (red), and Flavivirus group antigen (green). Hoechst stains nuclei (blue). Scale bars: 100  $\mu$ m (left panel), 10  $\mu$ m (right panels).

**Table S1. List of antibodies used in the study**

| Antigen                  | Cat#       | Supplier       | IgG type   | Dilution   | Note              |
|--------------------------|------------|----------------|------------|------------|-------------------|
| Flavivirus Group Antigen | MAB10216   | Millipore      | IgG2a      | 1:400(IHC) |                   |
| Tbr1                     | Ab31940    | Abcam          | Rabbit IgG | 1:200(IHC) | Layer V-VI        |
| Ctip2                    | Ab18465    | Abcam          | Rat IgG    | 1:200(IHC) | Layer V-VI        |
| Cux1                     | Sc-13024   | Santa Cruz     | Rabbit IgG | 1:200(IHC) | Layer II-IV       |
| NeuN                     | MAB377     | Millipore      | IgG1       | 1:500(IHC) |                   |
| Caspase 3                | 559565     | BD Bioscience  | Rabbit     | 1:200(IHC) |                   |
| Iba1                     | 019-19741  | Wako           | Rabbit     | 1:200(IHC) |                   |
| GFAP                     | Ab7260     | Abcam          | Rabbit     | 1:200(IHC) |                   |
| Sox2                     | 14-9811    | eBioscience    | Rat        | 1:200(IHC) |                   |
| Nestin                   | Ab6142     | Abcam          | Mouse IgG1 | 1:200(IHC) |                   |
| Cldu                     | ab6326     | Abcam          | Alexa594   | 1:200(IHC) | Antigen retrieval |
| Ki67                     | M7249      | Dako           | Rat        | 1:200(IHC) |                   |
| p-Histon3(ser10)         | 9701       | Cell signaling | Rabbit IgG | 1:200(IHC) |                   |
| Cyclin D1                | RM-2113-S0 | Fisher         | Rabbit IgG | 1:200(IHC) |                   |

Abbreviation: IHC, Immunohistochemical staining.
